# Supplementary material for: Orthorhombic lead-free hybrid perovskite CH3NH3SnI3 under strain: an ab initio study
Source: Royal Society of Chemistry journal article supplement (doi:10.1039/d4ra02804j), 2024-01-01
Supplement: d4ra02804j1.pdf [file d4ra02804j1.pdf]

# Supporting Information : Orthorhombic lead-free hybrid perovskite $\text{CH}_3\text{NH}_3\text{SnI}_3$ under strain: An ab-initio study

Amina Dendane,<sup>†</sup> Benali Rerbal,<sup>\*,†</sup> Tarik Ouahrani,<sup>\*,‡,¶,§</sup> Alejandro  
Molina-Sanchez,<sup>||</sup> Alfonso Muñoz,<sup>⊥</sup> and Daniel Errandonea<sup>\*,#</sup>

<sup>†</sup>*Laboratory of Materials Discovery, Unit of Research Materials and Renewable Energies,  
LEPM-URMER. Université de Tlemcen 13000 Algeria., Algeria;*

<sup>‡</sup>*Ecole supérieure en sciences appliquées, ESSA-Tlemcen, BB 165 RP Bel Horizon,  
Tlemcen 13000, Algeria.*

<sup>¶</sup>*Laboratoire de Physique Théorique, Université de Tlemcen, Algeria.*

<sup>§</sup>*Université de Lorraine, Laboratoire Lorrain de Chimie Moléculaire, CNRS, L2CM,  
F-57000 Metz, France*

<sup>||</sup>*Institute of Materials Science (ICMUV), University of Valencia, Catedrático Beltrán 2,  
E-46980 Valencia, Spain*

<sup>⊥</sup>*Departamento de Física, MALTA-Consolider Team, Universidad de La Laguna, San  
Cristóbal de La Laguna, E38200 Tenerife, Spain*

<sup>#</sup>*Departamento de Física Aplicada - Instituto de Ciencia de Materiales, Matter at High  
Pressure (MALTA) Consolider Team, Universidad de Valencia, Edificio de Investigación,  
C/Dr. Moliner 50, Burjassot, 46100, Valencia, Spain*

E-mail: [ben.rerbal@gmail.com](mailto:ben.rerbal@gmail.com); [tarik.ouahrani@univ-tlemcen.dz](mailto:tarik.ouahrani@univ-tlemcen.dz); [daniel.errandonea@uv.es](mailto:daniel.errandonea@uv.es)

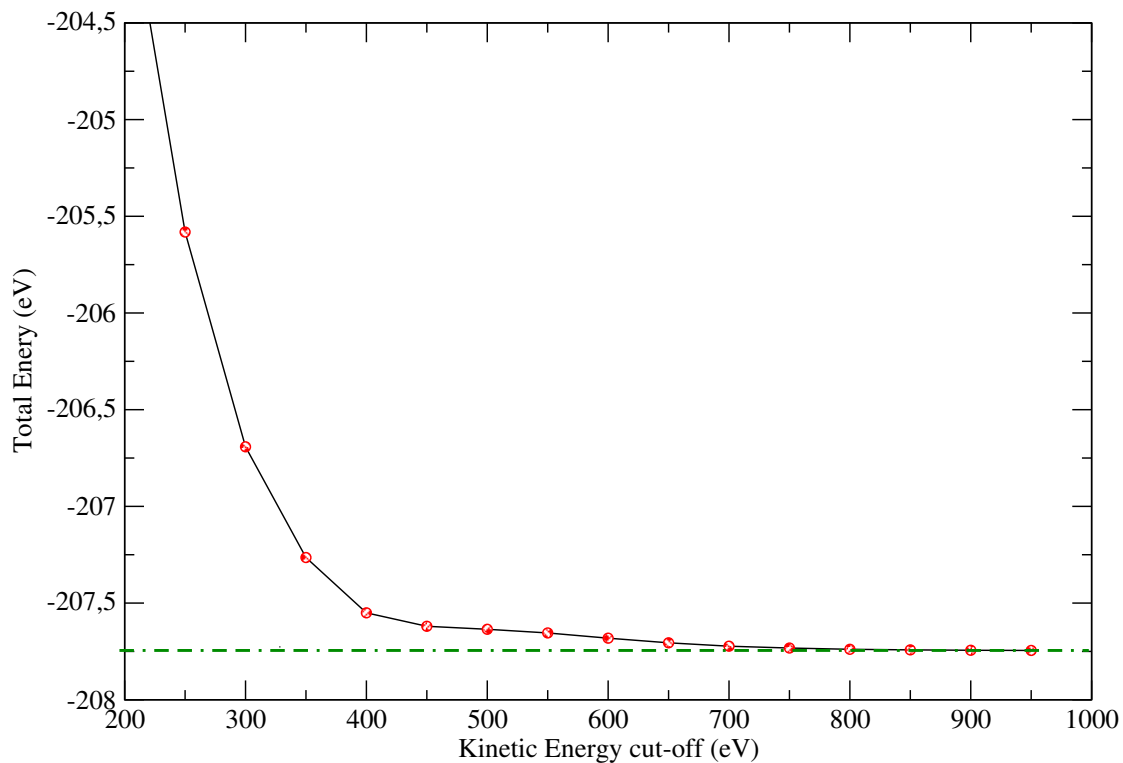

**Figure S1** (Color online) The variation of the total energy as a function of the cutoff energy of un-strained  $\text{CH}_3\text{NH}_3\text{SnI}_3$  hybrid perovskite

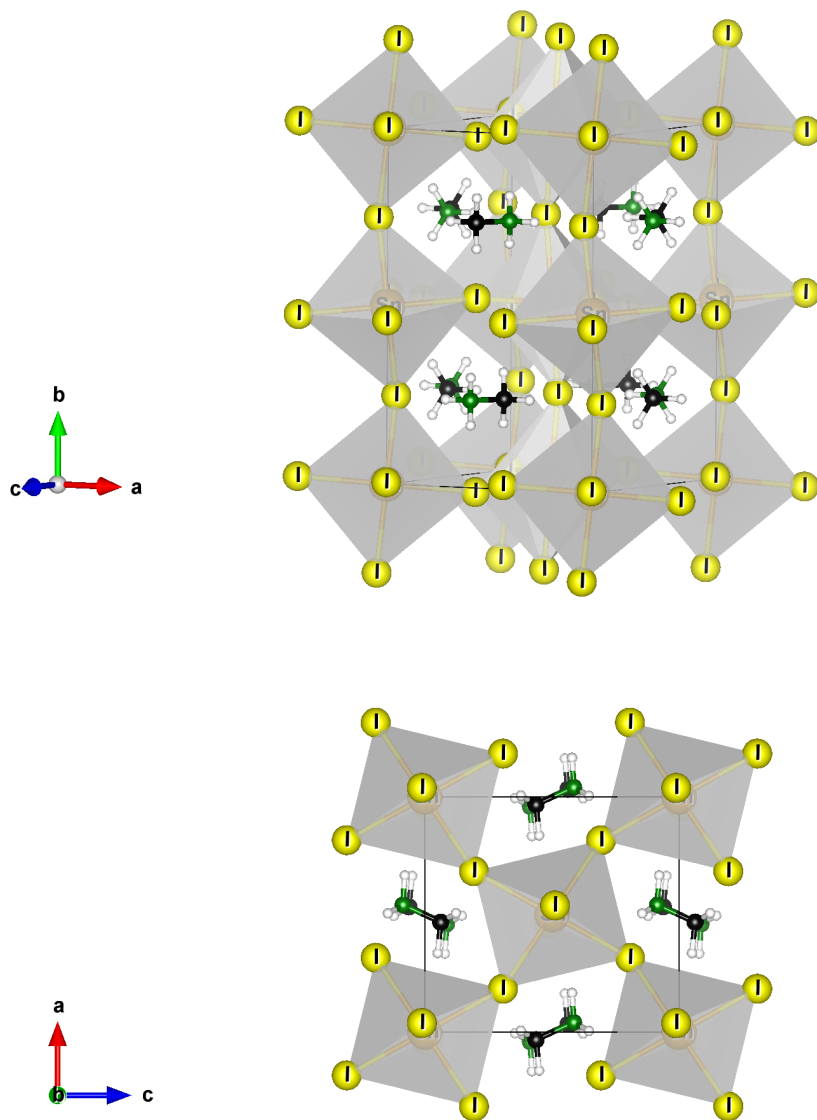

**Figure S2** (Color online) Schematic view of orthorhombic  $\text{CH}_3\text{NH}_3\text{SnI}_3$ . The Sn, I, H, C, and N atoms are shown in orange, yellow, white, black, and green color, respectively.

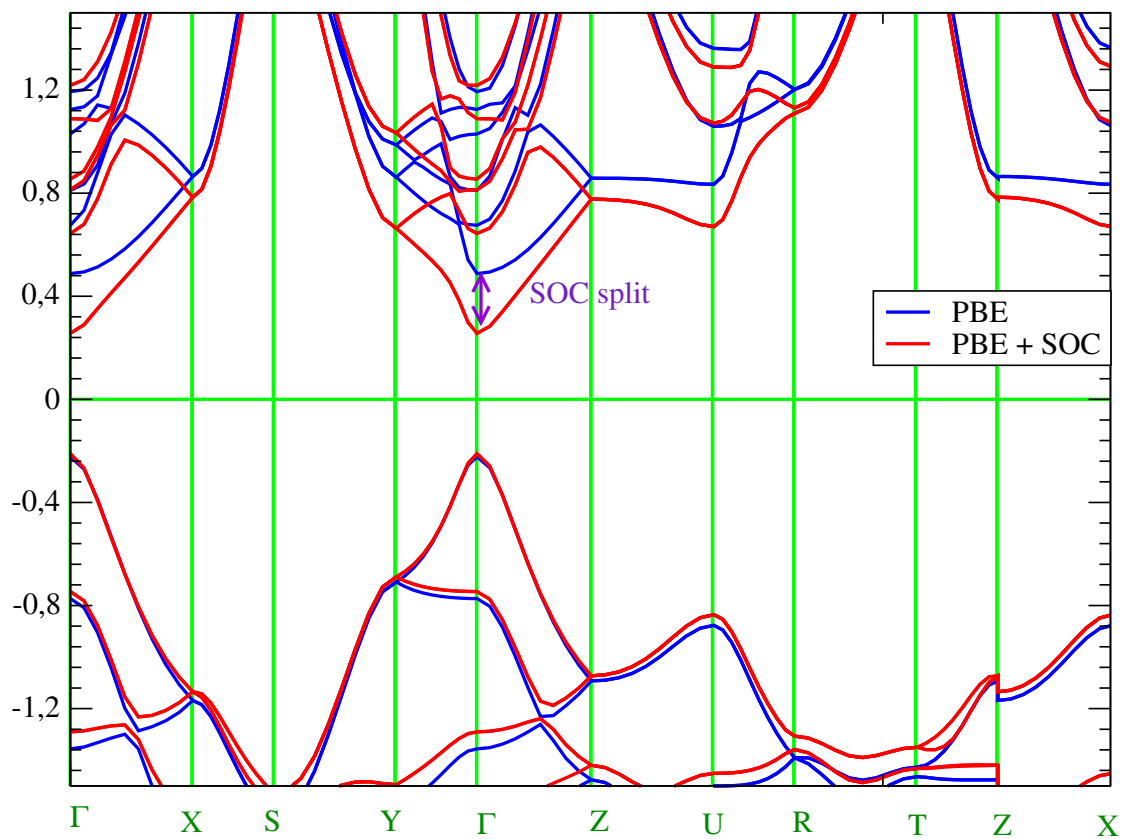

**Figure S3** (Color online) Electronic band structure of  $\text{CH}_3\text{NH}_3\text{SnI}_3$  calculated with spin-orbit coupling (SOC) (red line) and without SOC (blue line).
